# Supplementary material
Source: MDPI journal article supplement (https://www.mdpi.com/2073-4344/7/2/66)
Supplement: s1 [file s1]

# Supplementary Materials: A Recyclable Fluorous Hydrazine-1,2-Bis(Carbothioate) Organocatalyst for the Synthesis of $\beta$ -Chloroethers with *N*-Chlorosuccinimide

Yi-Wei Zhu \*, Yi-Xin Shi and Yu-Qi Yin

## General remarks

$^1\text{H}$  NMR,  $^{13}\text{C}$  NMR and  $^{19}\text{F}$  NMR spectra were characterized with a Bruker Advance RX500 spectrometer. All chemicals were reagent grade and used as purchased without further purifications. All the  $\beta$ -chloroether products are known compounds and were identified by comparing of their physical and spectra data with those reported in the literature.

## Procedure for the preparation of fluorous hydrazine-1,2-bis(carbothioate) 1

3,3,4,4,5,5,6,6,7,7,8,8,8-tridecafluoro-1-octanol **II** (3.641 g, 10 mmol) was slowly added to a solution of di(1H-imidazol-1-yl)methanethione **I** (1.958 g, 11 mmol) in dry  $\text{CH}_2\text{Cl}_2$ . After stirring for 12 h at room temperature, the crude reaction mixture was quenched with water and then extracted with petroleum ether (3 $\times$ 50 mL). The solvent was removed under reduced pressure and the residue was dried under high vacuum. The crude *O*-3,3,4,4,5,5,6,6,7,7,8,8,8-tridecafluorooctyl 1H-imidazole-1-carbothioate **III** was taken up in THF (50 mL) and hydrazine monohydrochloride (0.342 g, 5 mmol) and triethylamine (2.529 g, 25 mmol) were added at room temperature. After 7 d, the reaction mixture was quenched with brine (60 mL) and extracted with ether (3  $\times$  40 mL). The organic layers were combined and loaded onto the fluorous silica gel, eluted it with 80% methanol then with ether to give the fluorous compounds. Purification in standard gel if necessary, gave *O*,*O*-bis(3,3,4,4,5,5,6,6,7,7,8,8,8-tridecafluorooctyl) hydrazine-1,2-bis(carbothioate) **1** (2.363 g, 56%) as a white solid;  $^1\text{H}$  NMR (500 MHz,  $\text{CD}_3\text{OD}$ ):  $\delta$  4.83-4.76 (m, 4H), 2.78-2.60 (m, 4H);  $^{13}\text{C}$  NMR (125 MHz,  $\text{CD}_3\text{OD}$ ):  $\delta$  194.2 (b), 122.7-111.1 (m), 65.3 (t), 32.8 (b);  $^{19}\text{F}$  NMR:  $\delta$  -82.5 (6F), -114.5 (4F), -122.9 (4F), -123.9 (4F), -124.6 (4F), -127.4 (4F); MS (ESI $^+$ )  $m/z$  843.00 (M-H).

## Typical procedure for fluorous hydrazine-1,2-bis(carbothioate) 1 catalyzed the synthesis of $\beta$ -chloroethers and the recycling of fluorous organocatalyst

Fluorous hydrazine-1,2-bis(carbothioate) **1** (0.042 g, 0.05 mmol) with NCS (0.267 g, 2 mmol) was added in MeOH (3 mL) and stirred at 25  $^\circ\text{C}$  for 10 min. Then olefin (1 mmol) was added and the resulting mixture was stirred at 25  $^\circ\text{C}$  for 0.5–48 h. After the reaction completed, the mixture was concentrated and then loaded onto a FluoroFlash $^\circ$  silica gel cartridge (5 g), eluted by 80% methanol at first for non-fluorous components. Then dried over  $\text{Na}_2\text{SO}_4$  and evaporated for silica gel chromatography to provide a clear oil. Ether was then added onto the fluorous gel column to wash out the fluorous hydrazine-1,2-bis(carbothioate) **1**. After removal the ether, compound **1** was dried in vacuo at 40  $^\circ\text{C}$  for 8 h and could be directly used in the next run.

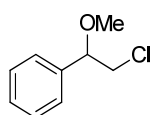

Clear oil.

$^1\text{H}$  NMR (500 MHz,  $\text{CDCl}_3$ ):  $\delta$  7.41-7.31 (m, 5H), 4.37 (dd, 1H,  $J$  = 8.0, 4.5), 3.65 (dd, 1H,  $J$  = 11.5, 8.0), 3.57 (dd, 1H,  $J$  = 11.5, 4.5), 3.31 (s, 3H).  $^{13}\text{C}$  NMR (125 MHz,  $\text{CDCl}_3$ ):  $\delta$  138.1, 128.8, 128.3, 126.8, 83.7, 57.1, 47.9

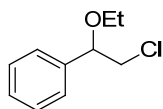

Clear oil.

$^1\text{H NMR}$  (500 MHz,  $\text{CDCl}_3$ ):  $\delta$  7.42-7.29 (m, 5H), 4.43 (dd, 1H,  $J = 8.0, 4.5$ ), 3.66 (dd, 1H,  $J = 11.5, 8.0$ ), 3.59 (dd, 1H,  $J = 11.5, 4.5$ ), 3.44 (m, 2H), 1.21 (t, 3H,  $J = 7.0$ ).  $^{13}\text{C NMR}$  (125 MHz,  $\text{CDCl}_3$ ):  $\delta$  139.3, 128.5, 128.2, 126.9, 81.7, 64.9, 48.1, 15.3

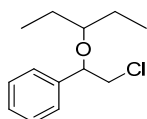

Clear oil.

$^1\text{H NMR}$  (500 MHz,  $\text{CDCl}_3$ ):  $\delta$  7.36-7.30 (m, 5H), 4.51 (dd, 1H,  $J = 8.0, 5.0$ ), 3.67 (dd, 1H,  $J = 11.0, 8.0$ ), 3.54 (dd, 1H,  $J = 11.0, 5.0$ ), 3.21-3.18 (m, 1H), 1.67-1.51 (m, 2H), 1.48-1.36 (m, 2H), 0.92 (t, 3H,  $J = 7.5$ ), 0.77 (t, 3H,  $J = 7.5$ ).  $^{13}\text{C NMR}$  (125 MHz,  $\text{CDCl}_3$ ):  $\delta$  140.1, 128.5, 128.1, 127.1, 80.2, 79.7, 48.6, 26.1, 24.9, 9.8, 8.8

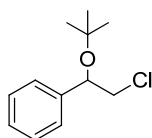

Clear oil.

$^1\text{H NMR}$  (500 MHz,  $\text{CDCl}_3$ ):  $\delta$  7.38-7.24 (m, 5H), 4.62 (dd, 1H,  $J = 8.0, 4.5$ ), 3.52 (dd, 1H,  $J = 11.0, 8.0$ ), 3.47 (dd, 1H,  $J = 11.0, 4.5$ ), 1.16 (s, 9H).  $^{13}\text{C NMR}$  (125 MHz,  $\text{CDCl}_3$ ):  $\delta$  142.3, 128.1, 127.5, 126.4, 75.0, 74.6, 49.2, 28.5

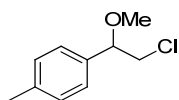

Clear oil.

$^1\text{H NMR}$  (500 MHz,  $\text{CDCl}_3$ ):  $\delta$  7.21-7.15 (m, 4H), 4.32 (dd, 1H,  $J = 8.25, 4.0$ ), 3.63 (dd, 1H,  $J = 11.5, 8.0$ ), 3.53 (dd, 1H,  $J = 11.5, 4.0$ ), 3.27 (s, 3H), 2.35 (s, 3H).  $^{13}\text{C NMR}$  (125 MHz,  $\text{CDCl}_3$ ):  $\delta$  138.1, 135.3, 129.1, 126.5, 83.4, 57.0, 48.2, 21.2

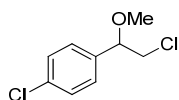

Clear oil.

$^1\text{H NMR}$  (500 MHz,  $\text{CDCl}_3$ ):  $\delta$  7.35 (d, 2H,  $J = 8.5$ ), 7.26 (d, 2H,  $J = 8.5$ ), 4.33 (dd, 1H,  $J = 7.25, 8.0$ ), 3.63 (dd, 1H,  $J = 11.5, 7.5$ ), 3.54 (dd, 1H,  $J = 11.5, 4.5$ ), 3.30 (s, 3H).  $^{13}\text{C NMR}$  (125 MHz,  $\text{CDCl}_3$ ):  $\delta$  137.1, 134.3, 128.6, 128.1, 82.7, 57.2

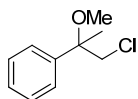

Clear oil.

$^1\text{H}$  NMR (500 MHz,  $\text{CDCl}_3$ ):  $\delta$  7.41-7.35 (m, 5H), 3.71 (d, 1H,  $J = 11.0$ ), 3.56 (d, 1H,  $J = 11.0$ ), 3.12 (s, 3H), 1.68 (s, 3H).  $^{13}\text{C}$  NMR (125 MHz,  $\text{CDCl}_3$ ):  $\delta$  141.6, 128.3, 127.9, 126.2, 78.5, 53.3, 50.8, 20.8

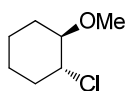

obtained as a anti diastereoisomer

Clear oil. Reaction time

$^1\text{H}$  NMR (500 MHz,  $\text{CDCl}_3$ ):  $\delta$  3.88-3.82 (m, 1H), 3.45 (s, 3H), 3.19-3.15 (m, 1H), 2.21-2.13 (m, 2H), 1.74-1.64 (m, 3H), 1.32-1.30 (m, 3H).  $^{13}\text{C}$  NMR (125 MHz,  $\text{CDCl}_3$ ):  $\delta$  82.9, 62.5, 57.1, 34.7, 29.8, 24.2, 23.1

1  $^1\text{H}$  NMR

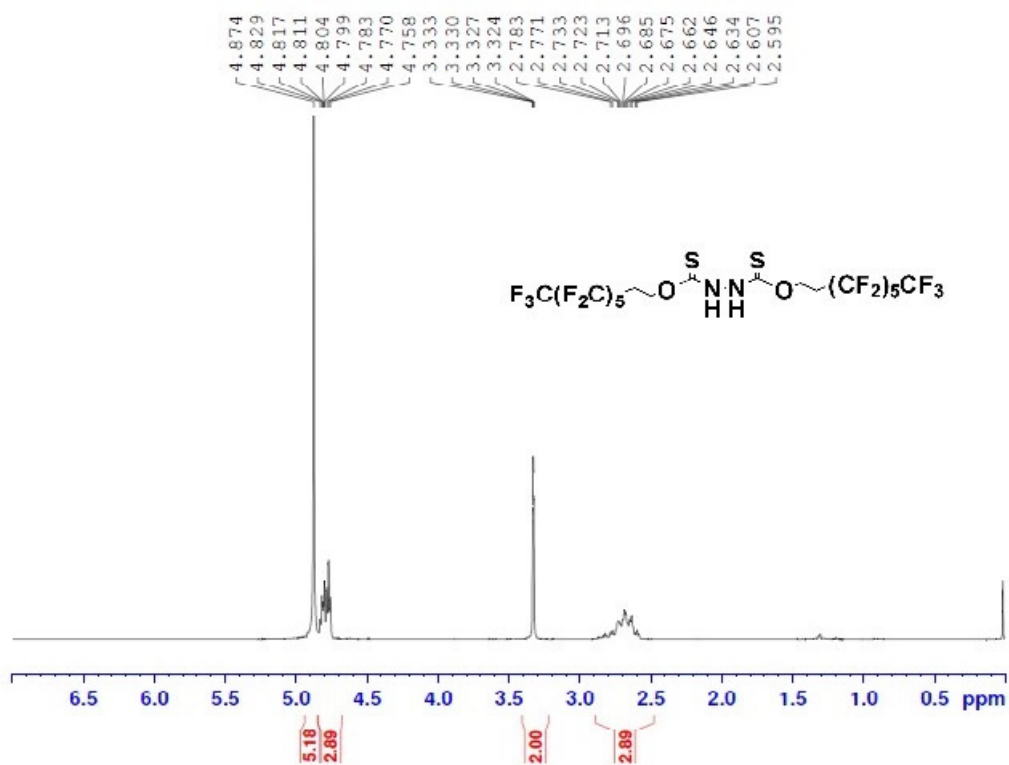

Figure S1.  $^1\text{H}$  NMR of the fluorine hydrazine-1,2-bis(carbothioate) 1.

**1 <sup>13</sup>C NMR**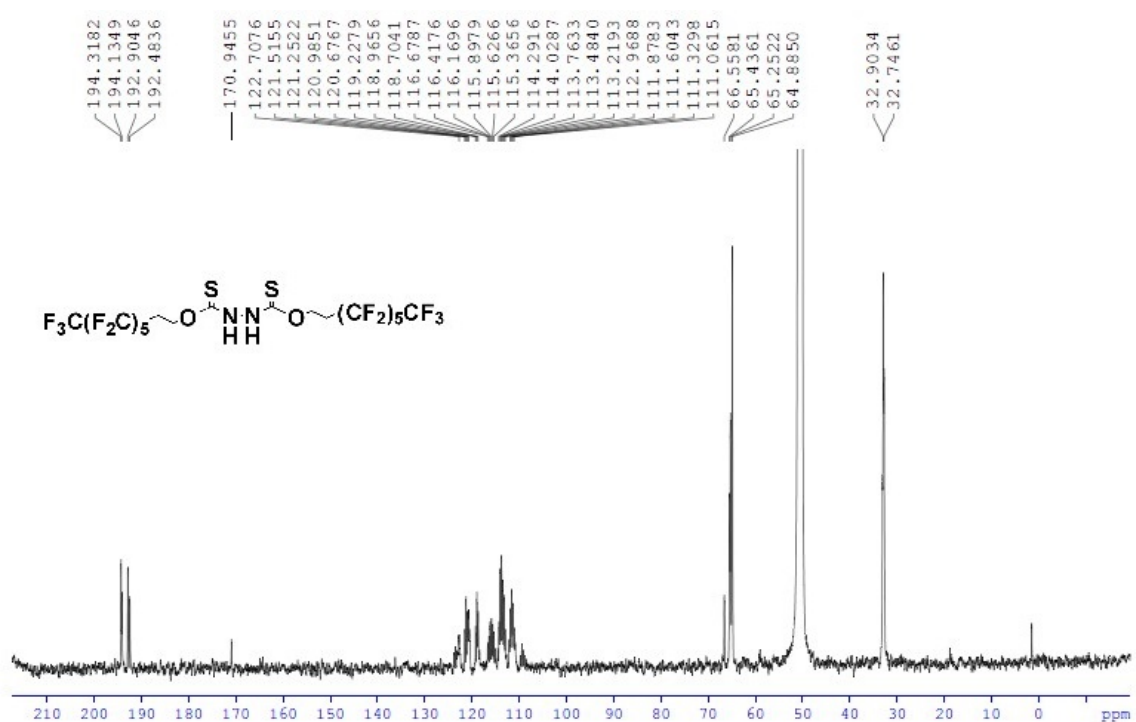**Figure S2.** <sup>13</sup>C NMR of the fluoruous hydrazine-1,2-bis(carbothioate) **1**.**1 <sup>19</sup>F NMR**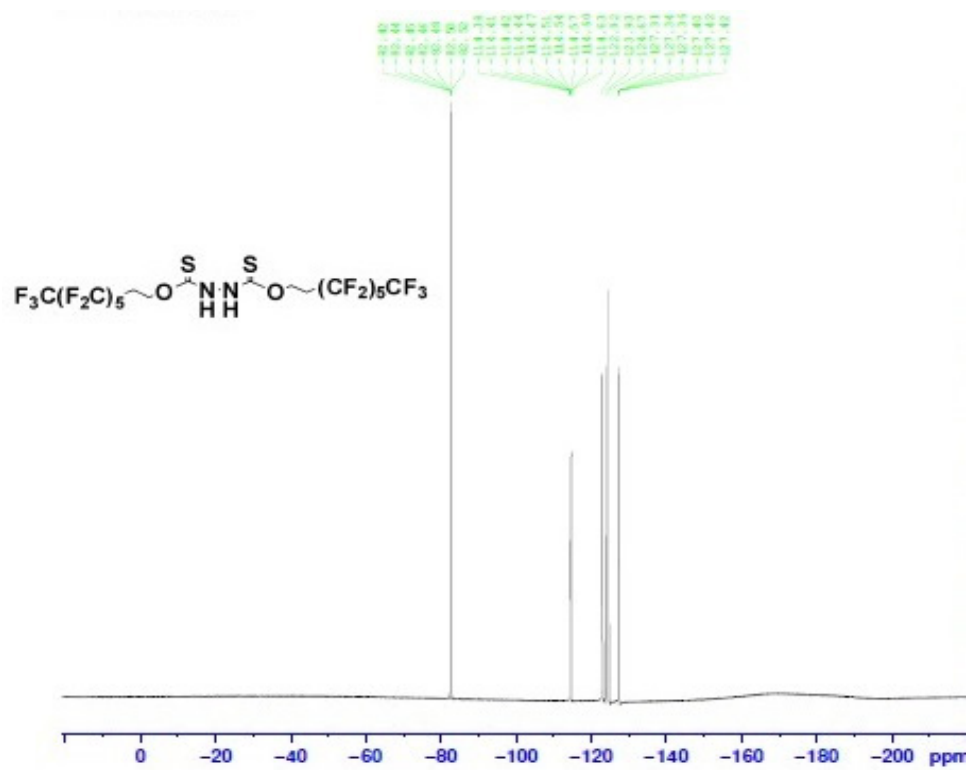**Figure S3.** <sup>19</sup>F NMR of the fluoruous hydrazine-1,2-bis(carbothioate) **1**.
